1 **Title: Exploring the effects of lack of pocket money on**  
2 **undergraduate clinical year health science students' learning**  
3 **activities**

4 **Principal Investigator: Marema Jebessa (Msc, lecturer) Addis Ababa University College of**  
5 **Health Sciences School of Medicine**

6 • **Email: [marem.jabessa@aau.edu.et](mailto:marem.jabessa@aau.edu.et)**

7 • **Mobile number: +251910622577**

8 **Co-authors:**

9 **1. Bizuayehu Nigatu Lemu (MSc, Lecturer)**

10 **Addis Ababa University College of Health Sciences School of Medicine, Addis Abab,**  
11 **Ethiopia**

12 • **Email: [nigatulemu@gmail.com](mailto:nigatulemu@gmail.com)**

13 • **Mobile number:+251911662044**

14 **2. Taklehaimanot Mezgebe Nguse(M.Sc., Lecturer)**

15 **Addis Ababa University College of Health Sciences School of Medicine Department**  
16 **of Medical Radiology Technology, Addis Abab, Ethiopia**

17 • **Email: [cumeltekle@gmail.com](mailto:cumeltekle@gmail.com)**

18 • **Mobile number: +251912023681**

19

20

21 **Abstract**

22 **Background**

23 In Ethiopia, There is a poor understanding of university expenses, regardless of the challenges  
24 that undergraduate students faced due to lack of pocket money and its tremendous impacts on  
25 learning activities.

26 In addition, undergraduate health sciences students need additional money when they start  
27 clinical placement learning.

28 **Objectives**

29 To explore the economic challenges that clinical year undergraduate health sciences students  
30 face with limited pocket money; and students' perceive of how limited pocket money affects  
31 their learning activities and how they react to challenges.

32 **Methods**

33 The descriptive qualitative study was conducted at Addis Ababa University (AAU) , College of  
34 Health Sciences(CHS) Medical Radiology Technology (MRT) department at Addis Ababa  
35 University. Ten participants recruited through purposive and snowball method; and the semi-  
36 structured interviews took place from January 28, 2019 to February 1, 2019. The Semi-structured  
37 questions explored participants' experiences and perceptions regarding challenges of lack of  
38 pocket money and its impacts on their learning activities, and their reaction to financial  
39 challenges.

40

41 **Results**

42 Four themes emerged from the interviews based on the research objectives, and they are  
43 challenges of getting pocket money, difficulty of affording important needs, self-management;  
44 and social life.

45 **Conclusion**

46 Based on the data, the underlying causes that lead students to face financial hardships can be  
47 solved by making public awareness regarding university expenses, clarifying the cost sharing  
48 system to the public, redesigning the cost sharing policy, improving university administration. In  
49 addition, giving short training to students on self-management and money management skills  
50 and, as well giving special attention to clinical practice facilities primarily concluded from the  
51 participants' descriptions.

52 **Abbreviations**

53 AAU-Addis Ababa University

54 CHS-College of Health Sciences

55 MRT-Medical Radiologic Technology

56 SES-Socioeconomic status

57 **Keywords:**

58 Undergraduate, Student, Higher Education, Pocket money, Learning, Ethiopia, health science,  
59 undergraduate, socioeconomic status, clinical placement

## 60 **Introduction**

61 The United Nations Educational, Scientific and Cultural Organization, World Conference on  
62 Higher Education (1) states, "higher education needs to be a fundamental right for all,"  
63 regardless of a student's ability to pay. Students from low socioeconomic status(SES)  
64 backgrounds have lower educational aspirations, persistence rates, and educational achievement  
65 during college(2),(3),(4)&(5).

66 Many Articles suggest that during clinical placements, students face increased financial costs  
67 such as transportation, food expenses, clothing, and other material needs(6),(7), &(8).

68 There are misunderstandings regarding challenges that undergraduate health sciences students  
69 from low SES background faced due to lack of pocket money and its impact on their learning  
70 activities in Ethiopia. Ethiopian Higher Education Proclamation and the Cost Sharing  
71 Regulations(9), Cost-sharing is an open policy; however, it does not allow students to get pocket  
72 money. Pocket money is the income that the student receives from a parent or guardian (10).

73 The aim of this research paper was to explore the impacts of lack of pocket money on  
74 undergraduate health science students' learning activities during clinical years, done in Ethiopia  
75 AAU, CHS. Both years three and four MRT students are the study population.

76 The research help in identifying the challenges that undergraduate health science student faced  
77 due to lack of pocket money and the perceived effects of financial hardships on their learning  
78 activities during clinical years.

## 79 **Methods**

### 80 **Study Design and Setting**

81 A descriptive qualitative study design was used to explore Impacts of lack of pocket money on  
82 undergraduate students' clinical learning activities.

83 Semi-structured interview used to gather data; exploring the students' perceptions of financial  
84 hardships on learning activities. This was study done in Ethiopia, at AAU, CHS department of  
85 MRT. Department of MRT is among the departments of School of Medicine in the college,  
86 which provides undergraduate program for MRT students

### 87 **Ethical Considerations**

88 Ethical clearance obtained from the Department of Medical Education Ethical Review  
89 Committee. Informed consent obtained from each individual study participants.

### 90 **Participant Recruitment and Data Collection**

91 We used purposive, and snowball sampling techniques. First, we invited those who have  
92 submitted letters to the department seeking financial support. Upon their coming, they were  
93 briefed on the project and asked for self-declaration of their financial status. Then, Snowball  
94 sampling technique used in order to get the remaining potential study participants. During all  
95 interviews, participants were asked to self-declare their financial status.

96 Finally, five participants from year four and seven participants from year three were interviewed.

97 During transcription, we found that two of the participants were self-declared and did not in  
98 financial hardship and dropped off from the data. Therefore, interviews from ten participants

99 were transcribed verbatim, and translated. The participants' descriptions are summarized in the  
100 table 1.

101 **Table 1: Participants' characteristics**

| <b>Participants Label</b> | <b>Gender</b> | <b>Age</b> | <b>Year of Study</b> | <b>Place of Origin</b> | <b>Parental job</b>                        | <b>Monthly Income (In Ethiopian Birr)</b> |
|---------------------------|---------------|------------|----------------------|------------------------|--------------------------------------------|-------------------------------------------|
| I                         | Male          | 20         | 3                    | Oromia                 | Farmers                                    | 500                                       |
| E                         | Male          | 22         | 3                    | Oromia Region          | Government employer                        | 500                                       |
| B                         | Male          | 23         | 4                    | Oromia region          | Farmers                                    | 500                                       |
| F                         | Female        | 21         | 3                    | Addis Ababa            | Business men                               | 1000                                      |
| A                         | Male          | 21         | 4                    | Addis                  | Supported by siblings(Government employed) | 500                                       |
| H                         | Male          | 21         | 3                    | Addis Ababa            | Self-employed                              | 500                                       |
| C                         |               | 21         | 4                    | Amhara Region          | Business men                               | 800                                       |
| G                         | Male          | 21         | 3                    | Amhara Region          | Teachers                                   | 500                                       |
| D                         | Male          |            | 4                    | Oromia Region          | Farmers                                    | 1500                                      |
| J                         | Female        | 20         | 3                    | Amhara Region          | Teachers                                   | 1000                                      |

## 103 **Interviews**

104 Semi-structured interview designed using Pierre Bourdieu's concepts of social capital. Two pilot  
105 interviews (not included in the analysis) were carried out to help refine the interview questions.  
106 Based on pilot interviews, the interview structure and questions redesigned for the actual  
107 scenario. An emphasis has been placed on lack of pocket money and its impacts on learning  
108 activities. The interviewer was selected from department of Nursing. The interviews began on  
109 January 28, 2019, and completed on February 1; 2019; with five year four and seven year three  
110 MRT students at AAU, CHS; in participant's language of preferences: 11 in Amharic and one in  
111 Afaan Oromo. Interview length ranged between 10 and 25 minutes. Participants were thanked  
112 for participating and provided with a notebook and 50 Ethiopian birr worth mobile cards each

## 113 **Data Analysis**

114 Researchers used a qualitative content analysis method (11)&(12)(12), and thematically analyzed  
115 the interviews to explore the challenges that low SES undergraduate clinical year health sciences  
116 students faces and the effects of lack of pocket money on their daily learning activities. The  
117 audio-recordings transcribed verbatim, and translated into English by the Researchers. We held  
118 four meeting to transcribe, translate, code, categorize and theme the data. The codes, themes and  
119 categories were formulated, and modified throughout the entire research process; with the full  
120 participation of all researchers. See Table 2 for sample of coding, categorizing and theming of  
121 data.

122

123 **Table two: summary of codes, categories, themes and quotes**

| Codes                                                                                                                              | Verbatim Quotes                                                                                                                                                                                                                                                                                                                                                                                                                                                                                                                    | Sub-Categories                                      | Themes                                                                      |
|------------------------------------------------------------------------------------------------------------------------------------|------------------------------------------------------------------------------------------------------------------------------------------------------------------------------------------------------------------------------------------------------------------------------------------------------------------------------------------------------------------------------------------------------------------------------------------------------------------------------------------------------------------------------------|-----------------------------------------------------|-----------------------------------------------------------------------------|
| Government covers expenses,<br>No expenses                                                                                         | <i>'...from my parents' side, there is thinking that there are no expenses in the governmental university and my opinion was the same at that time... However, after coming here it is beyond my expectations.'</i> D                                                                                                                                                                                                                                                                                                              | <b>1) Poor Understanding of University Expenses</b> | <b>1)Challenges of Getting enough Pocket Money</b>                          |
| Poor family, Little support                                                                                                        | <i>'My parents believe that we can be changed by education. However, they do not have and cannot provide me better things. They give me little from what they have.'</i> H                                                                                                                                                                                                                                                                                                                                                         | <b>2) Poverty</b>                                   |                                                                             |
| Afraid to ask support<br>Skill of making awareness<br>Convincing power                                                             | <i>'.....you have to convince your family and others who you think to help you and the other is you have asked for financial aid; I do not like to ask.'</i> I                                                                                                                                                                                                                                                                                                                                                                     | <b>3) Poor Skills of Asking Money</b>               |                                                                             |
| Increased expenses with years of study<br>Clinical placement transportation cost<br>Lack of transportation<br>Coming late to class | <i>' ... when I go for a clinical practice site there is no convenient transport service. I remember that I went on foot for many days to clinical practice. Because I had no money in my pocket and there was no transport service, but there was attendance at the clinical practice area; therefore the only choice I had was to go on foot.'</i> D<br><br><i>"... when I ran out of pocket money I went on foot. I sometimes came late to the class and this made me not to attend the class attentively. And other time I</i> | <b>1)Transportation Expenses</b>                    | Theme 2:<br>Difficulty of affording important needs and learning activities |



|                                                                    |                                                                                                                                                                                                                                                                                                                                                                                                                                                                      |                                 |  |
|--------------------------------------------------------------------|----------------------------------------------------------------------------------------------------------------------------------------------------------------------------------------------------------------------------------------------------------------------------------------------------------------------------------------------------------------------------------------------------------------------------------------------------------------------|---------------------------------|--|
| <p>Clinical placement expenses</p>                                 | <p><i>miss class totally." A</i></p> <p><i>'Because, the learning-teaching method and the environment where you stay differs from from pre-clinical year and clinical year... in our case during first year there is no place we go...and in the second year we start clinical practice. The service (transportation which is provided by the government) is not suitable and available as we want. Therefore, we are enforced to pay for transportation.'</i> E</p> |                                 |  |
| <p>unable to afford food stay hungry stop studying when hungry</p> | <p><i>'My expenses increased after I join AAU. Before I joined here, I eat food from the home...and when I could not afford food, I could not eat; I get hungry and you cannot study.'</i> H</p>                                                                                                                                                                                                                                                                     | <p>2) Food Expenses</p>         |  |
| <p>Cost of stationery materials<br/><br/>Cost for internet</p>     | <p><i>'... in our daily activities starting from the very smaller things like payment to buy pen, notebook, copying handouts and printings assignments; we pay out of our pocket.'</i> E</p> <p><i>'I cannot assess materials on the internet in my dorm; as my balance does not allow me... so I have to wait until I come to the University campus to download</i></p>                                                                                             | <p>3) Educational Resources</p> |  |

|                                                                  |                                                                                                                                                                                                                                                                                                                                                                     |                                          |                                                      |
|------------------------------------------------------------------|---------------------------------------------------------------------------------------------------------------------------------------------------------------------------------------------------------------------------------------------------------------------------------------------------------------------------------------------------------------------|------------------------------------------|------------------------------------------------------|
|                                                                  | <p><i>learning materials from the internet.</i></p> <p><i>Look if I have enough money; I can full my mobile balance and access on my phone at any time and place.' B</i></p>                                                                                                                                                                                        |                                          |                                                      |
| <p>Self-management</p> <p>Peer influence</p> <p>Self-control</p> | <p><i>'University is a place where great life challenge is. It is a place where you face a crossroad: a way to bad and good. So it is better to control one-self.' A</i></p> <p><i>'...You have to manage everything. Here, no family who guides you. There are so many students. Some smokes and some drink alcohols. It is you who decide your future.' B</i></p> | <p><b>1) Self-control</b></p>            | <p><b>3) Self-Management</b></p>                     |
| <p>Worry about managing money</p>                                | <p><i>'...when I was with my parents; they were very few things I have to worry about. Here, I have to worry about how to manage my money ...' J</i></p>                                                                                                                                                                                                            | <p><b>2) Pocket Money Management</b></p> |                                                      |
| <p>Relationship</p>                                              | <p><i>"... When I depart from my family and start to live on my own, I have to think about many things...in University, it is better to have a good relationship with other students." J</i></p>                                                                                                                                                                    |                                          | <p><b>4) Social Life and Learning Activities</b></p> |

125 The three levels of coding method(code, category and theme) taken as appropriate for coding the  
126 data(13). Accordingly, four main themes were emerged.

127 These themes include:

- 128 1. Discussing the challenges of getting pocket money
- 129 2. Difficulty of affording important needs
- 130 3. Self-management, and learning activities
- 131 4. Relationship and social life

132 To explore the causes and challenges that students from low SES background face, their  
133 experiences and reactions to challenges and, the impacts of lack of picket money on learning  
134 activities ; we applied Pierre Bourdieu's concepts of habitus, cultural and social capital (13) in  
135 analyzing the data.

### 136 **Theoretical approach: The Bourdieusian Concept of Habitus, Cultural and Social Capital**

137 This theoretical approach is used to analyze the students' experience of financial problems and its  
138 impacts on their learning activities.

139 Bourdieu, defines habitus as a property of actors (whether individuals, groups or institutions) that  
140 comprises a "structured and structuring structures"(14). It is "structured" by one's past and  
141 present circumstances, such as family upbringing and educational experiences.

142 Cultural capitals refer to family-based cultural traits such as work habits and basic learning  
143 orientations, prevailing cultural norms, values, and attitudes, and parenting styles and practices  
144 ((15). The concept of cultural capital was developed by Pierre Bourdieu and Jean-Claude

145 Passeron to analyze the impact of culture on the class system and on the relationship between  
146 action and social structure to the reproduction of the structure of power relationships and  
147 symbolic relationship between classes, by contributing to the reproduction of the structure of  
148 distribution of cultural capital among these classes”(14).

149 Bourdieu, defines social capital as the 'aggregate of actual or potential resources which are linked  
150 to possession of durable network of more or less institutionalized relationships of mutual  
151 acquaintance and recognition'(14). social capital by its function and a variety of different  
152 entities,' with two things in common(16): proximity factor is very important in the establishment  
153 of membership, whether this is a geographic, blood, faith, profession, interest, study, culture,  
154 language, economic, or social proximity.

## 155 **Result**

156 All participants discussed their perceived experiences of lack of pocket money as undergraduate  
157 student, and conceptualized its impacts on their learning process. They also explained the means  
158 they used to overcome the problems to succeed in their studies.

159 Participants' responses were categorized into four themes; each of them has correlation effects on  
160 students' learning activities:

- 161 1) Challenges of getting pocket money and its impacts on learning activities
- 162 2) Difficulty of affording important needs and its effects on learning activities
- 163 3) Self-management and learning activities
- 164 4) Relationship (social life) and learning activities

## 165 **Theme 1: Challenges of Getting enough Pocket Money**

166 Nearly all of participants mentioned that getting pocket money for the expenses in the university  
167 were a great problem, and identified that lack of awareness and absolute poverty are the main  
168 causes. Based on the data from the participants, we identified three categories, which contribute  
169 to challenges to access enough pocket money.

### 170 **Category 1: Poor Understanding of University Expenses**

171 Several participants discussed that most of the families have the idea that once their children  
172 joined public universities, all their expenses are going to be covered by the government. Thus,  
173 students identified this has been the most factor which causes them to get into financial troubles  
174 cause student gets into trouble.

175 One of participant described the situation as:

176 *'...from my parents' side, there is thinking that there are no expenses in the governmental*  
177 *university and my opinion was the same at that time. It is talked that the government covers*  
178 *everything. However, after coming here it is beyond my expectations.'* D

179 And another participant described:

180 *'My family believes that; once you joined university everything you need is provided by the*  
181 *government. They assume that you only need money from them only for soaps and other smaller*  
182 *things.'* I

183 These descriptions clearly show that there are misunderstandings of expenses in the university  
184 among different families in the country.

185 **Category 2: Poverty**

186 Some of students explained that even though some their parents know the expenses in the  
187 University, their economic status does not allow them to cover the expenses. This leads students  
188 to face financial challenges and they are challenged in attending their education properly.

189 One of participant student described the case:

190 *'My parents believe that we can be changed by education. However, they do not have and cannot*  
191 *provide us better things. They give me little from what they have.'* H

192 Poverty of parents or related families directly affects students' financial status and hence, it has  
193 a negative impact on their daily learning activities.

194 **Category 3: Poor Skills of Asking Money**

195 Participants explained that considering the community understandings of university expenses;  
196 one has to develop skill of persuading parents and families to get the required money.  
197 Unfortunately, several participants identified themselves that they lack this kind of skills; mainly  
198 due to culture of fearing to ask for money.

199 One of participant described as:

200 *'...you have to convince your family and others ...the other is you have asked for financial aid.'* I

201 Another participant also explained it:

202 *'My Parents do not know about handouts, assignments and that I went to clinical placements*  
203 *using transportation...they are not learned at higher education and had no experiences.'* B

204 For many participants asking for pocket money is another, and they mentioned that this has great  
205 impact on their learning activities.

## 206 **Theme 2: Difficulty of affording important needs and learning activities**

207 Several Study participants identified lack of pocket money has many problems for on their daily  
208 lives, particularly in fulfilling what they want to accomplish in their daily learning activities.  
209 Most of them described the small pocket many they get almost goes for fulfilling basic. Based on  
210 the data collected; theme 2 was divided into three categories.

### 211 **Category 1: Transportation Expenses**

212 Many participants mentioned most of their pocket money spent on transportation. In addition to  
213 transportation between two campuses, from home to the university; they described they faced  
214 another transportation cost burden during their placed for clinical practice away from their  
215 campus. Some of the participants mentioned that they enforced to go on foot when there is no  
216 access to transportation from university and run out of pocket money. Explaining these have a  
217 great influence in getting the required clinical skills.

218 This is evidence from one of the participant interview:

219 *' ... when I placed for clinical placement, I found that there is no convenient transport service. I*  
220 *remember that I went on foot for many days to clinical practice. Because I had no money in my*  
221 *pocket... but attendance was taken at the clinical practice area.'* D

222 Another participant described:

223 *'... when I ran out of pocket money I went on foot. I sometimes came late to the class and this*  
224 *made me not to focus on what takes in the class. And other time I miss class totally.'* A

225 Moreover, another participant explained:

## 226 **Category 2: Food Expenses**

227 Food is one of student's highest expenses. Several participants described different situations lead  
228 them to buy food. For instance, several participants identified that the food prepared by the  
229 university had many problems; quality and timing to mention.

230 One of participant mentioned:

231 *'My expenses increased after I join AAU. Before I joined here, I ate food from the home...and*  
232 *here when I could not afford food; I stayed hungry and could not study.'* H

233 Evidence from one of participant is described as:

234 *'... for example I use cafeteria. However, since the food is not so delicious I sometimes eat*  
235 *outside the campus.'* C

236 As described, by several participants lack of pocket money enforced them to stay hungry and  
237 described it is very difficult to study or attend the class properly while staying hungry. Hence,  
238 lack of pocket money has great influence on attending the class and studying for longer time  
239 effectively.

## 240 **Category 3: Educational Resources**

241 The educational resources on which participants spend their pocket money are identified as cost  
242 of stationery materials and cost of accessing to internet. We discussed below as sub-categories.

### 243 **Sub-category 1: Stationery materials**

244 Participants described that they spent on buying pens, notebooks, copying and printing handouts,  
245 and printing assignment materials almost daily.



246 Here is evidence from one of participant:

247 *'... in our daily activities starting from the very smaller things like payment to buy pen, notebook,*  
248 *copying handouts and printings assignments; we pay out of our pocket.'* E

249 Several participants identified that their inability to afford educational materials affected their  
250 overall learning activities.

## 251 **Sub-category 2: Access to the internet**

252 Many of participants identified , the campus where they live was not equipped with internet  
253 facilities and they need either to use mobile data or go to internet café; both need money.

254 One participant mentioned:

255 *'I cannot assess materials on the internet in my dorm... so I have to wait until I come to another*  
256 *university campus to use the internet. Look if I have enough money; I can full my mobile balance*  
257 *and access on my phone at any time and place.'* B

258 Another participant described:

259 *'...in our campus there is no good internet connectivity ... use internet by paying for it.'* E

260 Here, participants identified the need of internet for their learning process. Unfortunately, they  
261 did not get access to free internet services; and unable to pay for it has impact on their learning  
262 activities.

## 263 **Theme 3: Self-Management**

264 Several Participants mentioned departing from families and living in the university is the most  
265 challenging. Most of them discussed the scenario in relation to challenges of self-control and

266 pocket money management. Two sub-categories related were identified as self-control and  
267 pocket money management.

268

### 269 **Category 1: Self-control**

270 A university is a place where students start to exercise self-control. Most of the participants  
271 identified that when one has not enough pocket money and poor self-control it is very difficult to  
272 be successful in university study. In addition, they mentioned that self-control helps in  
273 controlling stress developed due to lack of pocket money and improved proper learning.

274 One participant mentioned:

275 *"University is a place where great life's challenge is. It is where one faces a crossroad: a way to*  
276 *bad and good. So it is better to control one-self." A*

277

278 Another participant mentioned said.

279 *"...You have to manage everything. Here, there is there no family around who guide you. There*  
280 *are so many students. Some smokes and some drink alcohols. It is you who decide your future."*

281 *B*

282 Many of the participants have focused on self-management and its importance in leading a  
283 successful university study. Even though, one has financial problem it is possible to have a  
284 successful study if skills of self-management practiced effectively. Interestingly most of the  
285 participants mentioned they have and developed good self-management.

## 286 **Category 2: Pocket Money Management**

287 Effective use of small pocket money while in university is very important as discussed by  
288 participants.

289 One of participant described:

290 "...One has to use the small money received hardly..." I

291 Another participant mentioned:

292 'In general, using the money provided to you effectively is so difficult and the education is also  
293 somewhat difficult.' B

## 294 **Theme 4: Relationship and Pocket Money**

295 Participants believed that success in higher education is highly related with having reliable and  
296 the right networks. They identified, due to lack of pocket money, they did not make connections  
297 with other partners and peers and noted that the lack of social life also affected their learning  
298 activities.

299 One interviewee expressed:

300 "... When I depart from my family and start to live on my own, I have to think about many  
301 things...in University, it is better to have a good relationship with other students." J

## 302 **Discussion**

303 Various factors contribute to students' financial challenges in the university. Lack of pocket  
304 money impacts on students learning activities are discussed by several participants.

305 In this study, Bourdieu's concepts of habitus, cultural and social capital was applied to explore  
306 what makes undergraduate clinical years health students get into financial pressures, and the  
307 impact of these challenges on their daily learning activities.

308 This study showed that the familial habitus of the participants' affects life in the university.  
309 Participants described that they were challenged; due to environmental changes. They mentioned  
310 that they faced like being managed by parents and families to self-management, from living with  
311 students of the same lifestyle to living with students of different background. With all these  
312 changes, lack of pocket money adds another stress to university life.

313 Several participants have mentioned that absence of government policy which entitles students to  
314 get financial support during undergraduate studies increased students financial hardship and this  
315 finding is similar with the study done in the United Kingdom(8). Students of low SES with a  
316 good self- management benefit from gaining social capital(15). Finding from this study support  
317 those of others; which similarly find a link between social bonding and achieving relief from the  
318 financial crisis: by developing a culture of borrowing from friends as described by several  
319 participants.

320 The current research found that self-management is the most important thing to resist financial  
321 pressures. Bourdieu concept of habitus (14), describing the way of acting, feeling and being is  
322 related to participants idea of self-control and pocket money management, which also described  
323 by most of the participants. This paper finds that establishing relationship with peers in  
324 University is important in successful study, and the concept is lightened by using the concept of  
325 habitus (13).

326 Similar to the study done in Australia(17), most of the participants had expected finance hardship  
327 to be the concern at the beginning of their degree; however many of them experienced acute  
328 financial hardship during clinical placements. This research found that students, who relocate for  
329 educational purposes, including placements, are economically disadvantaged and experience  
330 financial stress and this is similar to the finding (6).

331 The finding of the current study is also similar with research done in Greece(18)and Ethiopia(19)  
332 in that bad students' financial status is one of the causes of undergraduate students' stress.  
333 Participants' expressed that even though family misunderstanding of higher education expenses  
334 affected their learning activities, they compromised the challenges and work toward their  
335 educational activities (20).

336  
337 Unlike researches(21)&(22) the present study does not support the idea that financial pressure  
338 causes students to drop-out or quit their education. Instead of dropping out the participants  
339 reported different methods of overcoming the acute financial problems; borrowing from friends  
340 and developing strong self-management skills like prioritizing their basic and urgent needs and  
341 compromising other needs. Even though this finding is interesting, another research may be  
342 needed to see the relationship of Ethiopian health sciences undergraduate students' financial  
343 hardships and dropouts.

#### 344 **Strengths and Limitations**

345 This research considered a single-department student and one institution. However, with its  
346 limitations the current study contributes to a broader overview of the problem and to a better  
347 understanding of its causes.

348 **Conclusion**

349 This study revealed that the students' financial hardships in university occurred mainly due to  
350 lack of understanding about university expenses from families, absolute poverty, and poor  
351 university administrative services. The study also showed the cost-sharing system is not so  
352 helpful in supporting financially disadvantaged students.

353 Lack of pocket money had a negative impact on students' theoretical learning activities and  
354 clinical skill acquisition. Therefore; the department, the school, the college and the university  
355 should consider these problems and must look for solutions.

356 This study also recommends that the Ethiopian government, specifically Ministry of Science and  
357 Higher Education, should revise the Ethiopian cost-sharing system.

358 **Acknowledgements**

359 Our thanks also go to the Department of health science education for giving us this  
360 opportunity. We would also like to express our gratitude to Dr. Tina Martimianakis and Dr.  
361 Robert Paul for their Invaluable guidance, feedbacks and constructive comments they have  
362 provided throughout the preparation of this research projects.

363 Finally, we would like to express my appreciation to Debela Gela for his courage in collecting  
364 the data.

365

## 366 **11. References List**

- 367 1. Altbach PG, Reisberg L, Rumbley LE. Trends in Global Higher Education : Tracking an  
368 Academic Revolution. United Nations Educ Sci Cult Organ [Internet]. 2009;22. Available  
369 from: <http://unesdoc.unesco.org/images/0018/001832/183219e.pdf>
- 370 2. Alexander W. Astin. What matters in college? Vol. 79, Liberal Education. 1993. p. 4.
- 371 3. DiMaggio P, Mohr J. Cultural Capital , Educational Attainment , and Marital Selection  
372 Author ( s ): Paul DiMaggio and John Mohr Source : American Journal of Sociology , Vol  
373 . 90 , No . 6 ( May , 1985 ), pp . 1231-1261 Published by : The University of Chicago  
374 Press Stable URL. Am J Sociol. 1985;90(6):1231–61.
- 375 4. Lareau A. Home Advantage: Social Class and Parental Intervention in Elementary  
376 Education [Internet]. Rowman & Littlefield Publishers; 2000. Available from:  
377 <https://books.google.co.uk/books?id=Yb8cAAAAQBAJ>
- 378 5. McDonough PM. Choosing Colleges: How Social Class and Schools Structure  
379 Opportunity [Internet]. State University of New York Press; 1997. Available from:  
380 <https://books.google.co.uk/books?id=AVjdTBQdpJwC>
- 381 6. Sayer M, De Saintonge MC, Evans D, Wood D. Support for students with academic  
382 difficulties. Med Educ. 2002;36(7):643–50.
- 383 7. Heller DE. Student Price Response in Higher Education: An Update to Leslie and  
384 Brinkman. J Higher Educ [Internet]. 1997;68(6):624–59. Available from:  
385 <http://www.jstor.org/stable/2959966>
- 386 8. Moreau MP, Leathwood C. Balancing paid work and studies: Working (-class) students in  
387 higher education. Stud High Educ. 2006;31(1):23–42.
- 388 9. FDRE (Federal Democratic Republic of Ethiopia). Higher Education Proclamation No.

- 389 351/2003, Negarit Gazette, Addis Ababa.
- 390 10. Worley and Kitto 2001. Hypothetical model of the financial impact of student attachments  
391 on rural general practices. *Rural Remote Heal.* 2001;1(1):Epub 83.
- 392 11. Sandelowski M. What's in a name? Qualitative description revisited. *Res Nurs Health.*  
393 2010;33(1):77–84.
- 394 12. Ritchie J, Spencer L, O' Connor W. 'Carrying Out Qualitative Analysis' IN: Ritchie, J.  
395 and Lewis, J. - *Qualitative research practice: a guide for social science students and*  
396 *researchers*, pp. 219-262. In: Ritchie J, Lewis J, editors. *Qualitative research practice: a*  
397 *guide for social science students and researchers* [Internet]. London: SAGE; 2003.  
398 Available from:  
399 [http://www.library.mmu.ac.uk/secure/index.php?cat\\_file=&filename=y\\_21010010\\_ritchie](http://www.library.mmu.ac.uk/secure/index.php?cat_file=&filename=y_21010010_ritchie)  
400 [\\_carrying.pdf](#)
- 401 13. Saldaña J. *The coding manual for qualitative researchers. The coding manual for*  
402 *qualitative researchers.* Thousand Oaks, CA: Sage Publications Ltd; 2009. xi, 223–xi,  
403 223.
- 404 14. Bourdieu P. *Outline of a of Practice.* 1977;
- 405 15. Bourdieu P. Pierre Bourdieu 1986 - The forms of capital. *Handb Theory Res Sociol Educ.*  
406 1986;241–58.
- 407 16. Coleman JS. Social Capital in the Creation of Human Capital. *Am J Sociol* [Internet].  
408 1988 Jan 1;94:S95–120. Available from: <https://doi.org/10.1086/228943>
- 409 17. Wray N, McCall L. Money matters: Students' perceptions of the costs associated with  
410 placements. *Med Educ.* 2007;41(10):975–81.
- 411 18. Mouza A-M. Perceived Stress of the Undergraduate Students in Greece Due to the



- 412 Economic Crisis. *Procedia - Soc Behav Sci* [Internet]. 2015;177(July 2014):265–72.  
413 Available from: <http://dx.doi.org/10.1016/j.sbspro.2015.02.331>
- 414 19. Dachew BA, Bisetegn TA, Gebremariam RB. Prevalence of mental distress and associated  
415 factors among undergraduate students of University of Gondar, Northwest Ethiopia: A  
416 cross-sectional institutional based study. *PLoS One*. 2015;10(3):1–10.
- 417 20. Sewell WH, Hauser RM. *Agricultural & Applied Economics Association Causes and  
418 Consequences of Higher Education : Models of the Status Attainment Process* Published  
419 by: Oxford University Press on behalf of the Agricultural & Applied Economics  
420 Association Stable URL : [http://www.AmJAgricEcon.1972;54\(5\):851–61](http://www.AmJAgricEcon.1972;54(5):851-61).
- 421 21. Bennett R. Determinants of Undergraduate Student Drop Out Rates in a University  
422 Business Studies Department. *J Furth High Educ* [Internet]. 2003 May 1;27(2):123–41.  
423 Available from: <https://doi.org/10.1080/030987703200065154>
- 424 22. Trombitas K. Financial stress: An everyday reality for college students. *Inceptia*.  
425 2012;(July):12.  
426
